1 **Spontaneous emergence of azithromycin resistance in independent lineages of *Salmonella* Typhi**  
2 **in Northern India**

3

4 Megan E. Carey <sup>1†\*</sup>, Ruby Jain <sup>2 †</sup>, Mohammad Yousuf <sup>3</sup>, Mailis Maes <sup>1</sup>, Zoe A. Dyson <sup>1,4,5</sup>

5 Trang Nguyen Hoang Thu <sup>6</sup>, To Nguyen Thi Nguyen <sup>6</sup>, Thanh Ho Ngoc Dan <sup>6</sup>, Quynh Nhu Pham Nguyen <sup>6</sup>,

6 Jaspreet Mahindroo <sup>3</sup>, Duy Thanh Pham <sup>6,7</sup>, Kawaljeet Singh Sandha <sup>2</sup>,

7 Stephen Baker <sup>1†\*</sup> and Neelam Taneja <sup>3†</sup>

8

9 <sup>1</sup> Cambridge Institute of Therapeutic Immunology & Infectious Disease (CITIID), Department of Medicine,  
10 University of Cambridge, Cambridge, UK

11 <sup>2</sup> Civil Hospital, Manimajra, Chandigarh, India

12 <sup>3</sup> Department of Medical Microbiology, Postgraduate Institute of Medical Education and Research, Chandigarh,  
13 India

14 <sup>4</sup> Department of Infectious Diseases, Central Clinical School, Monash University, Melbourne, Victoria 3004,  
15 Australia

16 <sup>5</sup> London School of Hygiene & Tropical Medicine, London WC1E 7HT, UK

17 <sup>6</sup> The Hospital for Tropical Diseases, Wellcome Trust Major Overseas Programme, Oxford University Clinical  
18 Research Unit, Ho Chi Minh City, Vietnam

19 <sup>7</sup> Centre for Tropical Medicine and Global Health, University of Oxford, Oxford, United Kingdom

20 \* Corresponding author: Professor Stephen Baker, Cambridge Institute of Therapeutic Immunology &  
21 Infectious Disease (CITIID), Cambridge Biomedical Campus, University of Cambridge, Cambridge, United  
22 Kingdom CB2 0AW; Email: [sgb47@medschl.cam.ac.uk](mailto:sgb47@medschl.cam.ac.uk)

23 \*\* Alternative corresponding author: Megan Carey, Cambridge Institute of Therapeutic Immunology &  
24 Infectious Disease (CITIID), Cambridge Biomedical Campus, University of Cambridge, Cambridge, United  
25 Kingdom CB2 0AW; Email: [mec82@medschl.cam.ac.uk](mailto:mec82@medschl.cam.ac.uk)

26 † - these authors contributed equally to this work.

27

28

29

30

31 **Key points**

32 We identified ciprofloxacin/azithromycin-resistant *Salmonella* Typhi (*S. Typhi*) in Chandigarh in  
33 Northern India. The independent emergence of ciprofloxacin/azithromycin-resistant typhoid in  
34 Bangladesh, Pakistan, Nepal, and India and the continued spread of extensively-drug resistant (XDR)  
35 typhoid in Pakistan highlight the limitations of licensed oral treatments for typhoid fever in South  
36 Asia.

37

38 **Key words**

39 *Salmonella* Typhi; typhoid fever; antimicrobial resistance; azithromycin resistance; ciprofloxacin  
40 resistance; India

41

42

43

44

45

46

47

48

49

50

51

52

53

54

55

56

57

58

59 **Abstract**

60 *Background*

61 The emergence and spread of antimicrobial resistance (AMR) pose a major threat to the effective  
62 treatment and control of typhoid fever. The ongoing outbreak of extensively drug resistant (XDR)  
63 *Salmonella* Typhi (*S. Typhi*) in Pakistan has left azithromycin as the only remaining broadly  
64 efficacious oral antimicrobial for typhoid in South Asia. Ominously, azithromycin resistant *S. Typhi*  
65 organisms have been subsequently reported in Bangladesh, Pakistan, and Nepal.

66 *Methods*

67 Here, we aimed to understand the molecular basis of AMR in 66 *S. Typhi* isolated in a cross-sectional  
68 study performed in a suburb of Chandigarh in Northern India using whole genome sequencing (WGS)  
69 and phylogenetic analysis.

70 *Results*

71 We identified seven *S. Typhi* organisms with the R717Q mutation in the *acrB* gene that was recently  
72 found to confer resistance to azithromycin in Bangladesh. Six out of the azithromycin-resistant *S.*  
73 *Typhi* isolates also exhibited triple mutations in *gyrA* (S83F and D87N) and *parC* (S80I) genes and  
74 were resistant to ciprofloxacin. These contemporary ciprofloxacin/azithromycin-resistant isolates  
75 were phylogenetically distinct from each other and from those reported from Bangladesh, Pakistan,  
76 and Nepal.

77 *Conclusions*

78 The independent emergence of azithromycin resistant typhoid in Northern India reflects an emerging  
79 broader problem across South Asia and illustrates the urgent need for the introduction of typhoid  
80 conjugate vaccines (TCVs) in the region.

81

82

83

84

85

86

87 **Background**

88 *Salmonella enterica* serovar Typhi (*S. Typhi*), the etiologic agent of typhoid fever, is associated with  
89 an estimated 10.9 million infections and 116,800 deaths globally<sup>1</sup>. The majority of this disease burden  
90 is concentrated in South Asia, which has a modelled incidence rate of 592 cases per 100,000 person-  
91 years<sup>1</sup>. A pooled estimate of typhoid fever incidence of 377 cases per 100,000 in India has also been  
92 calculated using limited population-based data; significant geographical heterogeneity was observed<sup>2</sup>.  
93 The ongoing Surveillance for Enteric Fever in India (SEFI) study is generating geographically  
94 representative, age-specific incidence data, as well as additional information regarding cost of illness,  
95 range of clinical severity, and antimicrobial resistance (AMR) patterns associated with *S. Typhi* in  
96 India<sup>3</sup>. These data will undoubtedly provide a more comprehensive understanding of typhoid fever  
97 incidence rates across the Indian sub-continent, and ultimately, in supporting decision-making  
98 concerning typhoid conjugate vaccine (TCV) introduction in India<sup>4</sup>.

99

100 Growing rates of AMR have made typhoid control increasingly challenging, beginning with the rise  
101 of multi-drug resistance (MDR; resistant to chloramphenicol, trimethoprim-sulfamethoxazole,  
102 ampicillin) in the 1990s,<sup>5</sup> and the subsequent increase in fluoroquinolone resistance in the early  
103 2000s, which was predominantly focused in South and Southeast Asia<sup>6,7</sup>. Ultimately, these phenotypic  
104 changes led to the common use of third generation cephalosporins for treatment of typhoid fever. The  
105 emergence and spread of extensively-drug resistant (XDR; resistant to chloramphenicol, ampicillin,  
106 cotrimoxazole, streptomycin, fluoroquinolones, and third-generation cephalosporins) typhoid in  
107 Pakistan has left azithromycin as the only available oral antimicrobial for effective treatment of  
108 typhoid fever across South Asia<sup>8</sup>. Concerningly, azithromycin-resistant *S. Typhi* have subsequently  
109 been reported in Bangladesh, Pakistan, and Nepal, although this phenotype has not, as yet, arisen in  
110 XDR organisms<sup>9-11</sup>.

111

112 It is apparent that we have an escalating problem with drug resistant *S. Typhi* in South Asia, due in  
113 part to empirical treatment of febrile patients and widespread community availability of  
114 antimicrobials. We are currently unsure of the regional distribution of azithromycin resistance or the

115 potential for the emergence of a specific sub-lineage with this phenotype; as has been observed for  
116 MDR, XDR, and fluoroquinolone resistance. Here, we aimed to characterize the molecular basis of  
117 AMR in *S. Typhi* in a cross-sectional study performed in a suburb of Chandigarh in Northern India.  
118 Through whole genome sequencing (WGS), we describe the distribution of a collection of  
119 azithromycin resistant *S. Typhi* and show that these organisms have arisen independently of those in  
120 Pakistan and Bangladesh through the acquisition of an identical mutation in *arcB*. Our data support  
121 the prioritization of TCV introduction to prevent the continued emergence and spread of drug-  
122 resistant *S. Typhi* infections in South Asia.

123

## 124 **Methods**

### 125 *Ethics*

126 Ethical clearance was granted by the Institutional Ethics Committee of the Government Multi-  
127 specialty Hospital, Sector 16, Chandigarh (letter no GMSH/2018/8763 dated 26.7.2018) and the  
128 Postgraduate Institute of Medical Education & Research (PGIMER) Institutional Ethics Committee  
129 (IEC-08/2018-285 dated 24-9-2018). Administrative approval to carry out this collaborative study on  
130 enteric fever was granted by the Chandigarh Health Department (CHMM-2017/2991 dated  
131 28.8.2017). Approval was also granted by the Collaborative Research Committee of PGIMER (no  
132 79/227-Edu-18/4997 dated 12/12/2018). Informed consent was a prerequisite for inclusion in the  
133 study.

134

### 135 *Study design*

136 The *S. Typhi* isolates were obtained from blood cultures taken from febrile patients presenting to Civil  
137 Hospital Manimajra in Chandigarh (CHMM) between September 2016 and December 2017, where  
138 passive blood culture surveillance has been conducted since November 2013. CHMM is a 100-bed  
139 secondary health care facility located on the outskirts of Chandigarh, and serves a catchment area of  
140 approximately 200,000 people, including referrals from four primary care centers. Data from patients  
141 with blood culture confirmed invasive *Salmonella* infection, which includes *Salmonella* serovars  
142 Typhi and Paratyphi A, B and C, from both inpatient and outpatient wards were used in the study.

143 Clinical history, laboratory test results, and risk factor data were recorded for each confirmed case of  
144 enteric fever for patients residing in Manimajra. This analysis focuses solely on confirmed cases of *S.*  
145 *Typhi*.

146

#### 147 *Identification and Antimicrobial Susceptibility Testing*

148 Bacterial isolates were identified as *S. Typhi* using conventional biochemical tests; Motility agar,  
149 Hugh–Leifson Oxidative–Fermentation (OF) test, the Triple Sugar Iron (TSI) test, citrate test, urease  
150 test, phenyl pyruvic acid (PPA) test, and indole test. All isolates were eventually confirmed using  
151 antisera from Central Research Institute (CRI), Kasauli. Antimicrobial susceptibility was determined  
152 for the following antimicrobials by disc diffusion: ampicillin (10µg), chloramphenicol (30µg),  
153 trimethoprim/sulfamethoxazole (1.25/23.75µg), ceftriaxone (30µg), azithromycin (15µg),  
154 ciprofloxacin (5µg), and pefloxacin (5 µg). Zone diameters were measured and interpreted as per  
155 Clinical Laboratory Standards Institute (CLSI) guidelines<sup>12</sup>. Minimum inhibitory concentration testing  
156 was also conducted on all organisms showing resistance to any of the above antimicrobials by disc  
157 diffusion using E-tests (bioMerieux, France).

158

#### 159 *Whole-Genome Sequencing and Phylogenetic Analysis*

160 All *S. Typhi* were stored and shipped to PGIMER Chandigarh. Isolates from patients residing outside  
161 of Manimajra were excluded, as were those for which there was inadequate clinical metadata, or the  
162 DNA yield was below the amount required for WGS. Total genomic DNA was extracted from the *S.*  
163 *Typhi* using the Wizard genomic DNA extraction Kit (Promega, Wisconsin, USA) and subjected to  
164 WGS using the Illumina MiSeq platform (Illumina, San Diego, CA, USA) to generate 250 bp paired  
165 end reads. We then aimed to put these sequences into global and regional context. These reads were  
166 mapped against the CT18 reference sequence (accession no. AL513382) using the RedDog mapping  
167 pipeline (available at: <https://github.com/katholt/RedDog>) to identify single nucleotide variants  
168 (SNVs)<sup>13–15</sup>. After removing prophages and recombinant<sup>16</sup> and repetitive sequences, we generated a  
169 final alignment of 25,832 chromosomal SNVs for 3472 isolates. SRST2<sup>17</sup> was used with ARGannot<sup>18</sup>  
170 and PlasmidFinder<sup>19</sup> to identify AMR genes and plasmid replicons, respectively. Mutations in *gyrA*,

171 and *parC*, as well as the R717Q mutation in *acrB* were detected using GenoTyphi  
172 (<https://github.com/katholt/genotyphi>). Maximum likelihood phylogenetic trees were inferred from  
173 the chromosomal SNV alignments using RAxML (v8.2.9)<sup>20</sup>, and then visualized in Microreact<sup>21</sup>  
174 (<https://microreact.org/project/nniNzBL2uq3XZXYDKgG374>) and the Interactive Tree of Life  
175 (ITOL)<sup>22</sup>. Raw read data were deposited in the European Nucleotide under accession number  
176 ERP124488.

177

## 178 **Results**

### 179 *Epidemiological observations*

180 Typhoid fever is a major public health concern among children and young adults in this region of  
181 Northern India. It is thought that many cases in this area, a hub for the states of Punjab, Haryana, and  
182 Himachal Pradesh, are associated with the mixing of large populations of seasonal workers from the  
183 adjoining states. These workers generally live in informal dwellings with poor sanitation and limited  
184 access to safe water. Approximately 1,500 suspected enteric fever patients present to the CHMM  
185 facility annually and receive blood cultures, of which ~10% are positive for *S. Typhi*. There is a  
186 seasonal peak of typhoid fever in this facility during the monsoon months from May to September  
187 (Figure 1).

188

189 The *S. Typhi* organisms interrogated here by WGS were isolated between September 2016 and  
190 December 2017 and all originated from blood cultures taken from febrile patients attending CHMM.  
191 All patients with a positive blood culture for *S. Typhi* resided within 12.9 km of the healthcare facility  
192 and were located in an area of ~28 km<sup>2</sup> (Figure 2). *S. Typhi* was isolated throughout the specified  
193 months, again with higher number of cases observed between May and September. The median age of  
194 typhoid patients included in this analysis was seven years. The standard of care antimicrobials at this  
195 facility for patients with suspected enteric fever in outpatient settings are cotrimoxazole, cefixime,  
196 and/or azithromycin, and ceftriaxone for inpatients.

197

198

199

200 *The local phylogenetic structure of S. Typhi*

201 Ultimately, after data quality control, we generated and analyzed 66 *S. Typhi* genome sequences from  
202 Chandigarh. We observed that the population structure of *S. Typhi* around Chandigarh exhibited a  
203 high level of genetic diversity with eight co-circulating genotypes, indicative of population mixing  
204 and sustained introduction of organisms from a variety of locations across India (Figure 3). However,  
205 and in an analogous manner to other locations in Asia (and East Africa), most organisms (80%;  
206 53/66) belonged to lineage 4.3.1 (H58), with the majority of those (66%; 35/53) belonging to 4.3.1.2.  
207 In total, 24% (16/66) of isolates were subclade 4.3.1, and 3% (2/66) were 4.3.1.1. Additional  
208 genotypes were comprised of subclade 3.3 (7.5%, 5/66), clade 2.5 (7.5%, 5/66), clade 3.3.1 (1.5%,  
209 1/66), clade 4.1 (1.5%, 1/66) and major lineage 2 (genotype 2; 1.5%, 1/66).

210

211 *Fluoroquinolone resistance*

212 All (66/66) *S. Typhi* genome sequences, regardless of the genotype, possessed mutations in *gyrA*,  
213 conferring reduced susceptibility to fluoroquinolones. Notably, given that these mutations were  
214 observed in a range of genotypes, these had occurred independently, likely as a result of sustained  
215 antimicrobial pressure from widespread fluoroquinolone use. We further observed multiple *gyrA*  
216 mutation profiles in 4.3.1 organisms conferring intermediate resistance against fluoroquinolones  
217 (0.12µg/ml < ciprofloxacin MIC < 1µg/ml). These mutations included S83Y (29.1%; 16/55), S83F  
218 (16.4%; 9/55), and D87N (1.8%, 1/55). Additionally, we identified a subclade of organisms that  
219 represented 49.1% (27/55) of the 4.3.1 isolates, all of which belonged to 4.3.1.2, that contained the  
220 classical triple mutations associated with fluoroquinolone resistance (S83F and D87N in *gyrA* and  
221 S80I in *parC*)<sup>14</sup>. These organisms exhibited high-level fluoroquinolone resistance (ciprofloxacin MIC  
222 >24µg/ml). Our observations with respect to ubiquitous fluoroquinolone resistance were concerning;  
223 however, none of the *S. Typhi* isolates were MDR, which may be associated with a reduced reliance  
224 on older classes of antimicrobials.

225

226



227

228 *Azithromycin resistance*

229 We identified that 7/66 (10.6%) of the sequenced isolates contained a mutation in *acrB*, a gene  
230 encoding a component of the AcrAB efflux pump<sup>23</sup>. Mutations in *acrB* have been previously observed  
231 to be associated with resistance to azithromycin<sup>9</sup>. Here, the *acrB* mutation was non-synonymous  
232 (R717Q) and identified in six genotype 4.3.1.2 organisms and in one genotype 3.3.1 organism. These  
233 data are indicative of convergent mutation in different lineages, highlighting a potential increasing  
234 reliance on azithromycin; this selective pressure is further accentuated by the small clonal expansion  
235 in genotype 4.3.1.2 (Figure 3).

236

237 The R717Q mutation in *acrB* has been linked to high azithromycin MICs in genotype 4.3.1.1 *S. Typhi*  
238 isolates from Bangladesh<sup>8</sup> and also in genotype 4.3.1.1 *S. Typhi* in Pakistan<sup>9</sup>. The contemporary  
239 Indian *S. Typhi* isolates identified here with the same R717Q mutation in *acrB* showed resistance to  
240 azithromycin with an MIC >16µg/ml (range: 16 ->256µg/ml). Our data suggested that these R717Q  
241 mutations in the *acrB* gene have arisen spontaneously in India. To test this hypothesis, we constructed  
242 an expanded phylogenetic tree comprising a global *S. Typhi* collection, including organisms from  
243 across South Asia and the recently described azithromycin-resistant organisms from Bangladesh,  
244 Pakistan, and Nepal. We found that the azithromycin-resistant *S. Typhi* from India were  
245 phylogenetically distinct from those reported from Bangladesh, Pakistan, and Nepal (Figure 4).  
246 Additionally, we found that the azithromycin-resistant organisms associated with *acrB* mutations  
247 were dispersed around the tree and appear to have arisen on at least five different occasions, with a  
248 differing *acrB* mutation in organisms from Nepal (R717L)<sup>11</sup>.

249

250 The azithromycin-resistant isolates from India described here were isolated in 2017, meaning that  
251 they are contemporaneous with those reported from Bangladesh and Pakistan, and arose  
252 independently in phylogenetically distinct lineages. Lastly, six of the seven Indian isolates with the  
253 R717Q mutation in *acrB* (all 4.3.1.2) were also within the group of organisms with the triple mutation

254 associated with high level fluoroquinolone resistance, making these organisms highly resistant to  
255 these two key oral antimicrobials.

256

## 257 **Discussion**

258 In this study, we aimed to describe the genomic aspects the *S. Typhi* causing disease in an endemic  
259 region in Northern India. We investigated antimicrobial susceptibility patterns using phenotypic  
260 testing and WGS data and then placed these data into a regional and global context using published  
261 genomic data. Notably, we identified seven azithromycin resistant *S. Typhi* isolates. These organisms  
262 belonged to two different lineages and were genetically distinct from azithromycin resistant isolates  
263 recently reported from Bangladesh, Pakistan, and Nepal. Our observations suggest azithromycin  
264 resistance mutations at codon 717 in *arcB* are occurring independently in locations where there is  
265 substantial selective pressure induced by azithromycin. An increased reliance on azithromycin for  
266 treatment of typhoid fever and other invasive bacterial infections in South Asia, along with ongoing  
267 clinical trials measuring the impact of prophylactic administration of azithromycin on growth and  
268 mortality of infants and young children in Pakistan, Bangladesh, and India,<sup>24</sup> signal the inevitability of  
269 what Hooda and colleagues have termed pan-oral drug-resistant (PoDR) Typhi<sup>24</sup>. This scenario would  
270 necessitate inpatient intravenous drug administration for effective treatment of typhoid fever in the  
271 region at enormous cost to patients and to healthcare systems. Where intravenous drug administration  
272 is not an option, typhoid could once again become a disease with a high mortality rate, as was  
273 observed in the pre-antimicrobial era.

274

275 While the catchment area of this study is not representative of the entire Indian sub-continent, the  
276 phenomenon described herein is unlikely to be restricted to Chandigarh. India is currently the largest  
277 consumer of antimicrobials of all LMICs, with a reported 6.5 billion Defined Daily Doses (DDDs) in  
278 2015, or 13.6 DDDs per 1,000 inhabitants per day<sup>25,26</sup>. With such widespread availability and use of  
279 antimicrobials nationally, selective pressure on circulating pathogens is likely immense. The SEFI  
280 study will soon yield additional concrete AMR data from multiple, geographically representative sites  
281 in India, which will further elucidate AMR patterns across the country. Ideally, these data will inform

282 local antimicrobial stewardship practices and may be used as a basis for prioritization of future  
283 interventions.

284

285 How then to tackle this red queen dilemma? Drug development efforts cannot keep pace with  
286 bacterial evolution. Therefore, there is an urgent need for preventative interventions, namely water,  
287 sanitation and hygiene (WASH) interventions and TCV introduction, in India and across South Asia.  
288 There is also a need for enhanced typhoid surveillance, in South Asia and globally, specifically to  
289 monitor the emergence and spread of this and other resistance phenotypes. Historic genomic data  
290 show us that drug-resistant *S. Typhi* lineages emerge in South Asia and then spread to East Africa and  
291 even Latin America<sup>27</sup>. With the widespread prophylactic deployment of azithromycin through clinical  
292 studies and public health programs in West Africa and South Asia,<sup>24,28</sup> it will be critical to monitor  
293 global AMR patterns to mitigate a public health catastrophe.

294

295 This emerging problem additionally represents an opportunity for use of genomics to inform policy.  
296 WGS data provides clear information regarding AMR in organisms where molecular mechanisms of  
297 resistance are understood. Genomic surveillance also enables the identification and characterization of  
298 new resistance phenotypes, as was the case for XDR typhoid<sup>8</sup> and the new azithromycin resistant  
299 organisms identified in Bangladesh and described further here<sup>9</sup>. The outputs of antimicrobial  
300 susceptibility testing are not always straightforward, particularly in cases where susceptibility  
301 breakpoints have not been validated extensively using clinical data, as is the case for azithromycin<sup>29</sup>.  
302 Genomic AMR data can inform prioritization of TCV introduction, as well as implementation of  
303 WASH interventions. Genomic surveillance should also be an important component of long-term  
304 monitoring of the impact of widespread TCV deployment. Not only can genomic surveillance provide  
305 additional information on the impact of TCV on AMR, it will also illustrate the impact of vaccine on  
306 bacterial population structures and enable the identification of any vaccine escape mutants. Such  
307 information is vital to understanding the long-term impact of vaccine, and to facilitate any potential  
308 future efforts for global typhoid elimination.

309

310

311

312 *Acknowledgements*

313 We would like to thank the patients in Manimajra who participated in the study and the health care  
314 workers who screened and enrolled patients.

315

316 *Financial Support*

317 This work was supported by a Wellcome senior research fellowship to SB to (215515/Z/19/Z). DTP is  
318 funded as a leadership fellow through the Oak Foundation. The funders had no role in the design and  
319 conduct of the study; collection, management, analysis, and interpretation of the data; preparation,  
320 review, or approval of the manuscript; and decision to submit the manuscript for publication.

321

322 *Competing interests*

323 The authors declare no competing interests.

324

325 **References**

- 326 1. Stanaway JD, Reiner RC, Blacker BF, et al. The global burden of typhoid and paratyphoid  
327 fevers: a systematic analysis for the Global Burden of Disease Study 2017. *Lancet Infect Dis.*  
328 2019;19(4):369-381. doi:10.1016/S1473-3099(18)30685-6
- 329 2. John J, Van Aart CJC, Grassly NC. The Burden of Typhoid and Paratyphoid in India:  
330 Systematic Review and Meta-analysis. *PLoS Negl Trop Dis.* 2016;10(4):1-14.  
331 doi:10.1371/journal.pntd.0004616
- 332 3. John J, Bavdekar A, Rongsen-Chandola T, Dutta S, Kang G. Estimating the incidence of  
333 enteric fever in children in India: A multi-site, active fever surveillance of pediatric cohorts.  
334 *BMC Public Health.* 2018;18(1):1-6. doi:10.1186/s12889-018-5498-2
- 335 4. Srinivasan M, Sindhu KN, John J, Kang G. Opportunities for Typhoid Vaccination in India.  
336 *Indian Pediatr.* 2019;56(6):453-458. doi:10.1007/s13312-019-1566-7
- 337 5. Mirza SH, Beeching NJ, Hart CA. Multi-drug resistant typhoid: A global problem. *J Med*

- 338            *Microbiol.* 1996;44(5):317-319. doi:10.1099/00222615-44-5-317
- 339    6.        Britto CD, Wong VK, Dougan G, Pollard AJ. A systematic review of antimicrobial resistance  
340            in *Salmonella enterica* serovar Typhi, the etiological agent of typhoid. *PLoS Negl Trop Dis.*  
341            2018;12(10):e0006779. doi:10.1371/journal.pntd.0006779
- 342    7.        Wong VK, Baker S, Pickard DJ, et al. Phylogeographical analysis of the dominant multidrug-  
343            resistant H58 clade of *Salmonella* Typhi identifies inter-and intracontinental transmission  
344            events. *Nat Genet.* 2015;47(6):632-639. doi:10.1038/ng.3281
- 345    8.        Klemm EJ, Shakoor S, Page AJ, et al. Emergence of an extensively drug-resistant *Salmonella*  
346            *enterica* serovar typhi clone harboring a promiscuous plasmid encoding resistance to  
347            fluoroquinolones and third-generation cephalosporins. *MBio.* 2018;9(1):1-10.  
348            doi:10.1128/mBio.00105-18
- 349    9.        Hooda Y, Sajib MSI, Rahman H, et al. Molecular mechanism of azithromycin resistance  
350            among typhoidal *Salmonella* stains in Bangladesh identified through passive pediatric  
351            surveillance. *PLoS Negl Trop Dis.* 2019;13(11):e0007868. doi:10.1371/journal.pntd.0007868
- 352    10.        Iqbal, Junaid, Dehraj, Irum F., Carey, Megan E., Dyson, Zoe A., Garrett, Denise, Seidman,  
353            Jessica C., Kabir, Furqan, Saha, Senjuti, Baker, Stephen, Qamar FN. A Race against Time:  $\square$ :  
354            Reduced Azithromycin Susceptibility in *Salmonella enterica* Serovar Typhi in Pakistan.  
355            *mSphere.* 2020;5(4):e00215-20.
- 356    11.        Duy PT, Dongol S, Giri A, et al. The Emergence of azithromycin-resistant *Salmonella* Typhi  
357            in Nepal. *medRxiv.* 2020. doi:<https://doi.org/10.1101/2020.08.07.20166389>
- 358    12.        Clinical and Laboratory Standards Institute. Performance standards for antimicrobial  
359            susceptibility testing. *CLSI.* 2018.
- 360    13.        Wong VK, Baker S, Connor TR, et al. An extended genotyping framework for *Salmonella*  
361            *enterica* serovar Typhi, the cause of human typhoid. *Nat Commun.* 2016;7:1-11.  
362            doi:10.1038/ncomms12827
- 363    14.        Britto CD, Dyson ZA, Duchene S, et al. Laboratory and molecular surveillance of paediatric  
364            typhoidal *Salmonella* in Nepal: Antimicrobial resistance and implications for vaccine policy.  
365            *PLoS Negl Trop Dis.* 2018;12(4):1-19. doi:10.1371/journal.pntd.0006408

- 366 15. Rahman SIA, Dyson ZA, Klemm EJ, et al. Population structure and antimicrobial resistance  
367 patterns of Salmonella Typhi isolates in Bangladesh from 2004 to 2016. *bioRxiv*.  
368 doi:<http://dx.doi.org/10.1101/664136>.
- 369 16. Croucher NJ, Page AJ, Connor TR, et al. Rapid phylogenetic analysis of large samples of  
370 recombinant bacterial whole genome sequences using Gubbins. *Nucleic Acids Res*.  
371 2015;43(3):e15. doi:10.1093/nar/gku1196
- 372 17. Inouye M, Dashnow H, Raven LA, et al. SRST2: Rapid genomic surveillance for public health  
373 and hospital microbiology labs. *Genome Med*. 2014;6(11):1-16. doi:10.1186/s13073-014-  
374 0090-6
- 375 18. Gupta SK, Padmanabhan BR, Diene SM, et al. ARG-annot, a new bioinformatic tool to  
376 discover antibiotic resistance genes in bacterial genomes. *Antimicrob Agents Chemother*.  
377 2014;58(1):212-220. doi:10.1128/AAC.01310-13
- 378 19. Carattoli A, Zankari E, Garcíá-Fernández A, et al. In Silico detection and typing of plasmids  
379 using plasmidfinder and plasmid multilocus sequence typing. *Antimicrob Agents Chemother*.  
380 2014;58(7):3895-3903. doi:10.1128/AAC.02412-14
- 381 20. Stamatakis A. RAxML-VI-HPC: Maximum likelihood-based phylogenetic analyses with  
382 thousands of taxa and mixed models. *Bioinformatics*. 2006;22(21):2688-2690.  
383 doi:10.1093/bioinformatics/btl446
- 384 21. Argimón S, Abudahab K, Goater RJE, et al. Microreact: visualizing and sharing data for  
385 genomic epidemiology and phylogeography. *Microb genomics*. 2016;2(11):e000093.  
386 doi:10.1099/mgen.0.000093
- 387 22. Letunic I, Bork P. Interactive Tree Of Life (iTOL): an online tool for phylogenetic tree display  
388 and annotation. *Bioinformatics*. 2006;23(1):127-128.
- 389 23. Cunrath O, Meinel DM, Maturana P, et al. Quantitative contribution of efflux to multi-drug  
390 resistance of clinical Escherichia coli and Pseudomonas aeruginosa strains. *EBioMedicine*.  
391 2019;41:479-487. doi:10.1016/j.ebiom.2019.02.061
- 392 24. Hooda Y, Tanmoy AM, Sajib MSI, Saha S. Mass azithromycin administration: Considerations  
393 in an increasingly resistant world. *BMJ Glob Heal*. 2020;5(6):1-4. doi:10.1136/bmjgh-2020-

- 394 002446
- 395 25. Klein EY, Van Boeckel TP, Martinez EM, et al. Global increase and geographic convergence  
396 in antibiotic consumption between 2000 and 2015. *Proc Natl Acad Sci U S A*.  
397 2018;115(15):E3463-E3470. doi:10.1073/pnas.1717295115
- 398 26. Britto, Carl D., John, Jacob, Verghese, Valsan P. , Pollard AJ. A systematic review of  
399 antimicrobial resistance of typhoidal Salmonella in India. *Indian J Med Res*. 2019;149(2):151-  
400 163. <http://www.ijmr.org.in/text.asp?2019/149/2/151/259599>.
- 401 27. Park SE, Pham DT, Boinett C, et al. The phylogeography and incidence of multi-drug resistant  
402 typhoid fever in sub-Saharan Africa. *Nat Commun*. 2018;9(1). doi:10.1038/s41467-018-  
403 07370-z
- 404 28. Bogoch II, Utzinger J, Lo NC, Andrews JR. Antibacterial mass drug administration for child  
405 mortality reduction: Opportunities, concerns, and possible next steps. *PLoS Negl Trop Dis*.  
406 2019;13(5):1-6. doi:10.1371/journal.pntd.0007315
- 407 29. Parry CM, Thieu NTV, Dolecek C, et al. Clinically and microbiologically derived  
408 azithromycin susceptibility breakpoints for Salmonella enterica serovars Typhi and Paratyphi  
409 A. *Antimicrob Agents Chemother*. 2015;59(5):2756-2764. doi:10.1128/AAC.04729-14
- 410
- 411

412 **Figure legends**

413 **Figure 1.** The annual seasonality of typhoid fever in Manimajra, Chandigarh

414 Plots showing the number of typhoid cases recorded the civil hospital in Manimajra from 2014 to  
415 2019. The observed annual peak in typhoid cases corresponds with the monsoon season in Northern  
416 India (May to September).

417

418 **Figure 2.** The spatial distribution of confirmed typhoid fever cases in Chandigarh

419 Map of Chandigarh (scale shown) of the residential locations of the *S. Typhi* cases recorded at the  
420 civil hospital in Manimajra between September 2016 and December 2017. *S. Typhi* genotype is  
421 indicated by color (see key), azithromycin-resistant isolates are indicated with stars, and the number  
422 of cases in each coordinate is represented by the size of the circles. All cases were located within a 28  
423 km<sup>2</sup> area. There is a cluster of cases of genotype 4.3.1.2 in a 0.25 km<sup>2</sup> area of central Manimajra,  
424 which includes five of the six closely related azithromycin-resistant isolates.

425

426 **Figure 3.** The phylogenetic distribution of *S. Typhi* isolated at the civil hospital in Manimajra,

427 Chandigarh

428 Phylogenetic tree made in Ram of the 67 isolates genome sequenced. This collection shows  
429 considerable genetic diversity, with eight genotypes represented (as colour coded on branches and in  
430 the key). Mutations in the Quinolone Resistance Determining Region (QRDR), and presence of the  
431 *acrB*-R717Q mutation are shown for each organism. There are two distinct clusters of organisms with  
432 the *acrB* mutation that confers azithromycin resistance; each of these individual organisms indicated  
433 with a star.

434

435 **Figure 4.** Azithromycin resistant *S. Typhi* in global context

436 Diagram depicts a maximum likelihood rooted phylogenetic tree with a final alignment of 25,832  
437 chromosomal SNVs for 3,472 globally representative isolates, including all publicly available isolates  
438 from India. The colour of the internal branches represents the genotype, the colored ring around the  
439 tree indicates the country or region of origin for each isolate, and the blue stars indicate which isolates



440 were originate from this study. Additionally, the tree contains each known *S. Typhi* isolate with an  
441 *acrB* mutation in public databases, these originate from India, Nepal, Bangladesh, and Pakistan. The  
442 location of the XDR isolates from Pakistan are added for context.

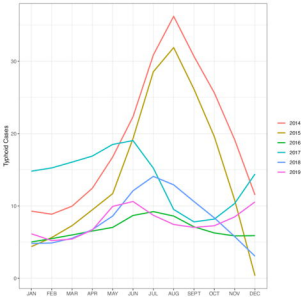

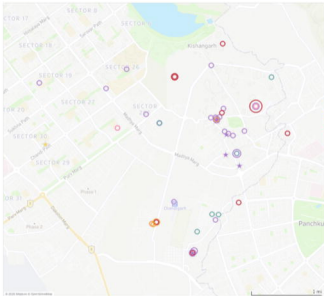

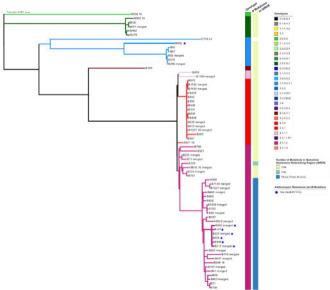

## Genotypes

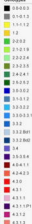

## Country

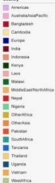

## Chandigarh isolates

★ Chandigarh isolates

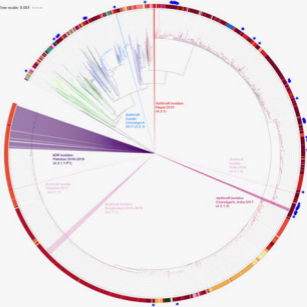

Source: https://www.biorxiv.org/content/10.1101/2020.10.23.351957v1.full.pdf
